# Supplementary material
Source: PubMed Central journal article supplement (PMC2694120)

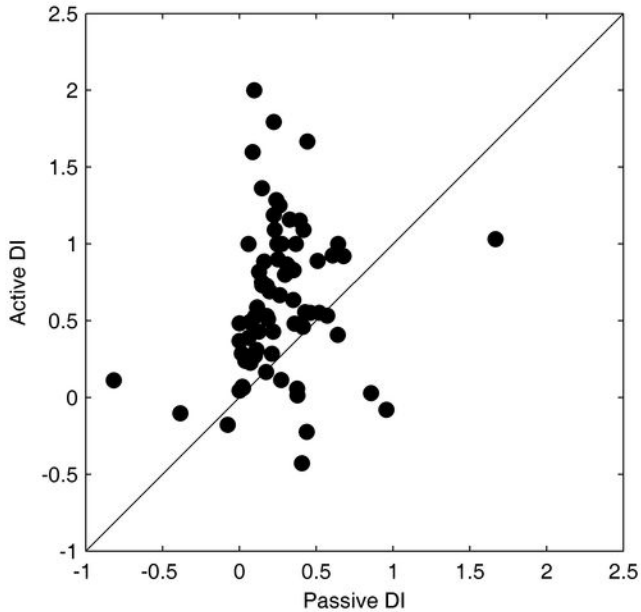

Supplement: supp_91254.2008_suppdata.pdf [file supp_91254.2008_suppdata.pdf]
